# Supplementary material for: Metformin Is Associated With Higher Relative Abundance of Mucin-Degrading Akkermansia muciniphila and Several Short-Chain Fatty Acid–Producing Microbiota in the Gut
Source: Oxford University Press journal article supplement (doi:10.2337/dc16-1324), 2016-11-14

## SUPPLEMENTARY DATA

### Supplemental Research Design and Methods

#### *Anthropometric and clinical evaluations*

Weight, height, waist circumference and four skinfolds (biceps, triceps, subscapular and ileocrestal) were measured with international techniques after training and standardizing evaluators. Weight was measured with Cardinal Detecto DR400C digital scales (St. Webb City, MO), height with Seca portable measuring rods (Hamburg, Germany), waist circumference with Mabis measuring tapes (Waukegan, IL) and skinfolds with Guide Slim adipometers (Plymouth, MI). Each anthropometric measure was evaluated twice and the average of the two measures was reported. Skinfolds served to compute the percentage of body fat using the logarithm of the sum of the four folds to estimate body density (1) and calculate the fat percentage (2).

To measure clinical parameters in blood, we collected peripheral venous blood from all the participants and isolated the serum using standard protocols. HDLcholesterol, LDLcholesterol, VLDL cholesterol, total cholesterol and triglycerides were measured by colorimetric enzymatic assay (cobas 701; Roche, Mannheim, Germany); apolipoprotein B by immune-nephelometry (BN II system; Siemens, Malvern, USA); fasting glucose by ultraviolet irradiation assay (cobas 701; Roche, Mannheim, Germany); glycated hemoglobin (HbA1C) by high-performance liquid chromatography (Premier Hb9210; Lab Care, England); fasting insulin by chemiluminescence immunoassay (cobas E411; Roche, Mannheim, Germany); leptin by micro ELISA (DSX-ELISA Processing System; Dynex, Louvain-la Neuve, Belgium); adiponectin by lanthanide chelate excite ultra assay (LANCE; Perkin Elmer, Waltham, USA); and high sensitivity CRP by particle-enhanced immune-turbidimetric assay (cobas 502; Roche, Mannheim, Germany). Blood insulin served to calculate the insulin resistance index using the homeostasis model assessment HOMA2 v2.2.3 (3).

#### *Dietary intake assessment*

Food intake was evaluated through 24-hour dietary recalls(4). Briefly, each participant was personally interviewed by a standardized member of the research team whom captured detailed information about all foods and beverages consumed by the respondent in the past 24 hours. Interviews were randomly distributed in the different days of the week. Food models, geometric figures and pictures were used by the interviewers to assess portion sizes and improve accuracy. 10% of the participants were interviewed a second time a different day of the week to take intra-subject variability into account. Estimation of energy intake, macro- and micronutrients was obtained for each participant using EVINDI 4.0 (5) and PC-SIDE 1.0 (6).

## SUPPLEMENTARY DATA

### *Microbial DNA analysis*

We extracted DNA sequences and quality scores from the paired fastq files and assembled the reads into contigs. We eliminated sequences containing bases with a quality score below 20, ambiguous bases, or shorter than 275 base pairs. Next, we aligned the sequences using the SILVA reference alignment v.123 (7), removed sequences with a homopolymer run  $\geq 8$  nucleotides and sequences that did not overlap the region of the alignment spanning the V4 region of the 16S rRNA gene. Then, we carried a preclustering step in which sequences with an identity  $\geq 99\%$  (*i.e.*, sequences differing in two nucleotides or less) were merged. The chimeric sequences were detected and discarded with UCHIME (8). After that, we assigned the taxonomic classification to sequences using the Ribosomal Database Project PDS database v.14 (9) and removed sequences classified as mitochondria, eukaryota or unknown. Finally, using the average neighbor algorithm we generated operational taxonomic units (OTUs) delimited at 97% identity, which we then taxonomically classified by consensus using Greengenes 13\_8\_99 (10). We tested for potential contaminating sequences by comparing the relative abundances of unique OTUs detected in actual samples and negative controls. Parallel sequencing of a mock community revealed a mean error rate of 0.12% (min = 0.015%, max = 0.233%, median = 0.108%).

## SUPPLEMENTARY DATA

### Supplemental References

1. Durnin J V, Womersley J. Body fat assessed from total body density and its estimation from skinfold thickness: measurements on 481 men and women aged from 16 to 72 years. *Br J Nutr.* 1974;32(1):77–97.
2. Siri WE. Body composition from fluid spaces and density: analysis of methods. *Tech Meas body Compos.* Washington, DC: National Academy of Sciences; 1961;61:223–44.
3. Levy JC, Matthews DR HM. Correct Homeostasis Model Assessment (HOMA) Evaluation uses the computer program. *Diabetes Care.* 1998;21:2191–2.
4. Johnson RK. Dietary intake--how do we measure what people are really eating? *Obes Res.* 2002;10(Suppl 1):63S – 68S.
5. Manjarrés L, Manjarrés S. Programa de Evaluación de Ingesta Dietética EVINDI v4. Medellín: Escuela de Nutrición y Dietética, Universidad de Antioquia; 2008.
6. PC-Side. Department of Statistics, Iowa State University; 2003.
7. Quast C, Pruesse E, Yilmaz P, Gerken J, Schweer T, Yarza P, et al. The SILVA ribosomal RNA gene database project: Improved data processing and web-based tools. *Nucleic Acids Res.* 2013;41(D1).
8. Edgar RC, Haas BJ, Clemente JC, Quince C, Knight R. UCHIME improves sensitivity and speed of chimera detection. *Bioinformatics.* 2011;27(16):2194–200.
9. Cole JR, Wang Q, Fish JA, Chai B, McGarrell DM, Sun Y, et al. Ribosomal Database Project: Data and tools for high throughput rRNA analysis. *Nucleic Acids Res.* 2014;42(D1):D633–42.
10. DeSantis TZ, Hugenholtz P, Larsen N, Rojas M, Brodie EL, Keller K, et al. Greengenes, a chimera-checked 16S rRNA gene database and workbench compatible with ARB. *Appl Environ Microbiol.* 2006;72:5069–72.

## SUPPLEMENTARY DATA

**Supplementary Table S1.** Drugs taken on a regular basis within the last three months by participants of the study. T2D-met<sup>+</sup> = diabetic participants taking metformin; T2D-met<sup>-</sup> = diabetic participants not taking metformin; ND = non-diabetic participants. NSAID = non-steroidal anti-inflammatory drug. \*Patients unaware of their diabetes status at the beginning of the study.

| Patient ID | Group                | Drugs                                                                                                  |
|------------|----------------------|--------------------------------------------------------------------------------------------------------|
| MI-013     | T2D-met <sup>+</sup> | Lovastatin, Metformin                                                                                  |
| MI-025     | T2D-met <sup>+</sup> | Atorvastatin, Eutirox, Metformin, Sertraline                                                           |
| MI-027     | T2D-met <sup>+</sup> | Insulin, Metformin                                                                                     |
| MI-040     | T2D-met <sup>+</sup> | Fluoxetine, Metformin                                                                                  |
| MI-091     | T2D-met <sup>+</sup> | Metformin, Omeprazole                                                                                  |
| MI-126     | T2D-met <sup>+</sup> | Acetaminophen, Losartan, Metformin, Metoprolol                                                         |
| MI-135     | T2D-met <sup>+</sup> | Biperiden, Carbamazepine, Clonazepam, Insulin, Levomepromazine, Metformin, Tramadol                    |
| MI-137     | T2D-met <sup>+</sup> | Losartan, Metformin                                                                                    |
| MI-219     | T2D-met <sup>+</sup> | Insulin, Metformin                                                                                     |
| MI-254     | T2D-met <sup>+</sup> | Aspirin, Insulin, Losartan, Lovastatin, Metformin, Omeprazole, Thioctacid                              |
| MI-403     | T2D-met <sup>+</sup> | Amlodipine, Atorvastatin, Enalapril, Glibenclamide, Losartan, Metformin, NSAID                         |
| MI-412     | T2D-met <sup>+</sup> | Atorvastatin, Loratadine, Losartan, Metformin                                                          |
| MI-425     | T2D-met <sup>+</sup> | Atorvastatin, Esomeprazole, Losartan, Metformin                                                        |
| MI-450     | T2D-met <sup>+</sup> | Fluoxetine, Loratadine, Metformin                                                                      |
| MI-010     | T2D-met <sup>-</sup> | Atorvastatin, Aspirin, Enalapril, Glibenclamide, Omeprazole                                            |
| MI-017*    | T2D-met <sup>-</sup> | Enalapril, Gemfibrozil                                                                                 |
| MI-043*    | T2D-met <sup>-</sup> | Enalapril, Verapamil                                                                                   |
| MI-072     | T2D-met <sup>-</sup> | Atorvastatin, Hydrochlorothiazide, Losartan, Verapamil                                                 |
| MI-182     | T2D-met <sup>-</sup> | Fluconazole                                                                                            |
| MI-213     | T2D-met <sup>-</sup> | Losartan                                                                                               |
| MI-236     | T2D-met <sup>-</sup> | Glibenclamide                                                                                          |
| MI-289     | T2D-met <sup>-</sup> | None                                                                                                   |
| MI-301     | T2D-met <sup>-</sup> | None                                                                                                   |
| MI-315     | T2D-met <sup>-</sup> | Insulin, Thyroxine                                                                                     |
| MI-344     | T2D-met <sup>-</sup> | Losartan, Metoprolol                                                                                   |
| MI-420     | T2D-met <sup>-</sup> | Aspirin, Cabergoline, Diovan, Esomeprazole, Inhaler (unknown), Levothyroxine, Montelukast, Tolterodine |
| MI-428     | T2D-met <sup>-</sup> | None                                                                                                   |
| MI-449     | T2D-met <sup>-</sup> | None                                                                                                   |
| MI-004     | ND                   | Atorvastatin, Esomeprazole, Losartan                                                                   |
| MI-009     | ND                   | None                                                                                                   |
| MI-018     | ND                   | None                                                                                                   |
| MI-020     | ND                   | Enalapril, Lovastatin, Verapamil                                                                       |
| MI-023     | ND                   | Beclometasone, Salbutamol, Esomeprazole, Losartan, Ketotifen, Atorvastatin                             |
| MI-030     | ND                   | Enalapril, Lovastatin, NSAID                                                                           |
| MI-035     | ND                   | Levothyroxine                                                                                          |
| MI-037     | ND                   | None                                                                                                   |
| MI-038     | ND                   | None                                                                                                   |
| MI-041     | ND                   | Folic acid, Losartan, Omeprazole                                                                       |
| MI-046     | ND                   | Lovastatin, Thyroxine                                                                                  |
| MI-052     | ND                   | None                                                                                                   |
| MI-055     | ND                   | None                                                                                                   |
| MI-064     | ND                   | None                                                                                                   |
| MI-065     | ND                   | Amlodipine, Coumadin, Losartan, Metildigoxin, Metoprolol, Spironolactone, Warfarin                     |
| MI-069     | ND                   | None                                                                                                   |
| MI-070     | ND                   | Losartan, Metoprolol, Pregabalin, Sertraline                                                           |

## SUPPLEMENTARY DATA

|        |    |                                                                                   |
|--------|----|-----------------------------------------------------------------------------------|
| MI-074 | ND | Atorvastatin                                                                      |
| MI-075 | ND | Acetaminophen, Loratadine, Losartan, Lovastatin                                   |
| MI-076 | ND | None                                                                              |
| MI-079 | ND | Hydrochlorothiazide, Losartan                                                     |
| MI-088 | ND | Eutirox, Gemfibrozil                                                              |
| MI-104 | ND | None                                                                              |
| MI-112 | ND | None                                                                              |
| MI-115 | ND | None                                                                              |
| MI-119 | ND | None                                                                              |
| MI-120 | ND | None                                                                              |
| MI-123 | ND | None                                                                              |
| MI-138 | ND | Losartan, Lovastatin, Omeprazole                                                  |
| MI-150 | ND | Aspirin, Losartan                                                                 |
| MI-156 | ND | None                                                                              |
| MI-159 | ND | None                                                                              |
| MI-169 | ND | None                                                                              |
| MI-172 | ND | None                                                                              |
| MI-174 | ND | None                                                                              |
| MI-175 | ND | None                                                                              |
| MI-188 | ND | None                                                                              |
| MI-189 | ND | Losartan                                                                          |
| MI-210 | ND | None                                                                              |
| MI-215 | ND | None                                                                              |
| MI-220 | ND | None                                                                              |
| MI-225 | ND | None                                                                              |
| MI-226 | ND | None                                                                              |
| MI-248 | ND | Statins (unknown)                                                                 |
| MI-256 | ND | Acetaminophen                                                                     |
| MI-260 | ND | Losartan, Lovastatin, Metoprolol, Pregabalin, Verapamil                           |
| MI-261 | ND | None                                                                              |
| MI-262 | ND | Amlodipine, Aspirin, Losartan                                                     |
| MI-266 | ND | None                                                                              |
| MI-269 | ND | None                                                                              |
| MI-271 | ND | None                                                                              |
| MI-274 | ND | Losartan                                                                          |
| MI-275 | ND | None                                                                              |
| MI-276 | ND | None                                                                              |
| MI-278 | ND | None                                                                              |
| MI-284 | ND | Blood pressure drug (unknown), Cholesterol drug (unknown), Thyroid drug (unknown) |
| MI-306 | ND | None                                                                              |
| MI-307 | ND | None                                                                              |
| MI-308 | ND | Analgesics (unknown), Methocarbamol                                               |
| MI-316 | ND | None                                                                              |
| MI-317 | ND | None                                                                              |
| MI-320 | ND | None                                                                              |
| MI-332 | ND | None                                                                              |
| MI-336 | ND | None                                                                              |
| MI-338 | ND | None                                                                              |
| MI-356 | ND | None                                                                              |
| MI-363 | ND | None                                                                              |
| MI-372 | ND | Losartan                                                                          |
| MI-374 | ND | None                                                                              |
| MI-384 | ND | Loratadine                                                                        |
| MI-389 | ND | None                                                                              |

## SUPPLEMENTARY DATA

---

|        |    |                                            |
|--------|----|--------------------------------------------|
| MI-393 | ND | None                                       |
| MI-394 | ND | None                                       |
| MI-396 | ND | None                                       |
| MI-397 | ND | None                                       |
| MI-399 | ND | Enalapril, Eutirox, Fluoxetine, Imipramine |
| MI-404 | ND | None                                       |
| MI-411 | ND | None                                       |
| MI-416 | ND | None                                       |
| MI-417 | ND | None                                       |
| MI-430 | ND | None                                       |
| MI-440 | ND | None                                       |
| MI-451 | ND | Losartan                                   |
| MI-458 | ND | None                                       |

---

## SUPPLEMENTARY DATA

**Supplementary Figure S1.** Rarefaction curves based on the number of observed operational taxonomic units (OTUs) in the three groups of participants. Yellow = diabetic participants taking metformin (T2D-met+); red = diabetic participants not taking metformin (T2D-met-); blue = non-diabetic participants (ND).

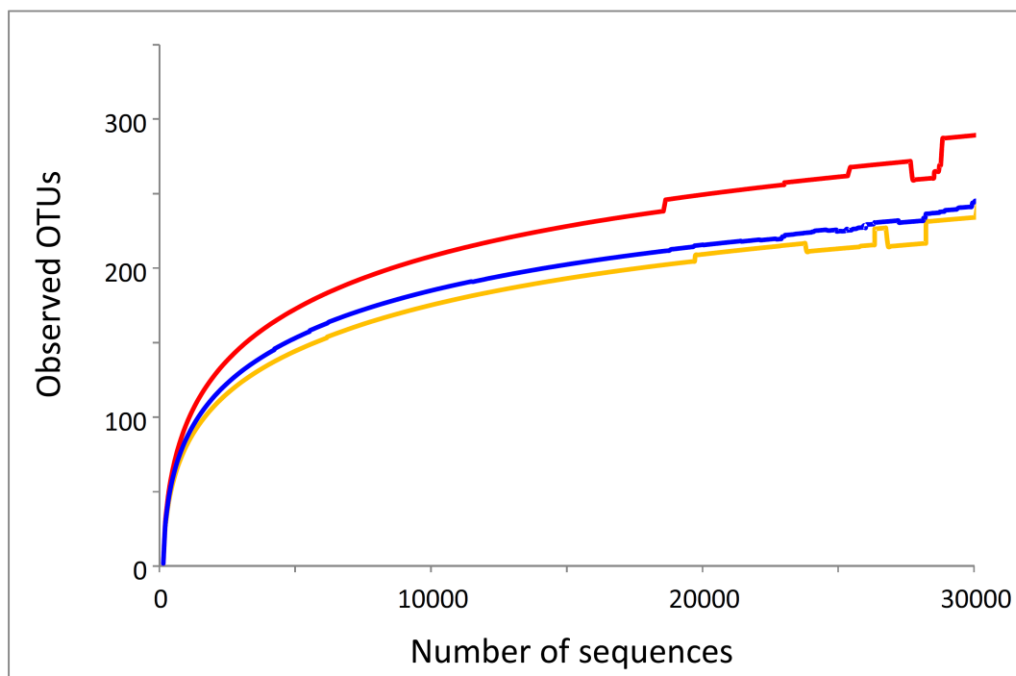

Supplement: dc161324supplementarydata.pdf [file dc161324supplementarydata.pdf]
